# Supplementary material
Source: PubMed Central journal article supplement (PMC4555699)
Supplement: ijcep0008-8048-f5.pdf [file ijcep0008-8048-f5.pdf]

## MiR-192 regulates apoptosis and proliferation via Bim

**Table S1.** Primers used in the paper were listed

| Gene                  | Primer  | Sequence (5'-3')                |
|-----------------------|---------|---------------------------------|
| Primers for qRT-PCR   |         |                                 |
| U6                    | forward | CTCGCTTCGGCAGCACA               |
|                       | reverse | AACGCTTCACGAATTTGCGT            |
| MiR-192               | forward | GGGGCTGACCTATGAATTGA            |
|                       | reverse | CAGTGCAGGGTCCGAGGT              |
| Bim                   | forward | CCCCGCTTTTCATCTTTATG            |
|                       | reverse | GGACTTGGGGTTTGTGTT              |
| GAPDH                 | forward | CATCACCATCTTCCAGGAGCG           |
|                       | reverse | TGACCTTGCCCACAGCCTTG            |
| Primers for Bim 3'UTR |         |                                 |
| Bim 3'UTR-wt          | forward | GGGGAGCTCGCAATAAACACACACAAAATAG |
|                       | reverse | GCCTCTAGACACATCACACAGAAAAGAATC  |
| Bim 3'UTR-mut         | forward | TTGCAGATATTACTTATCAACTGAGCCAAAT |
|                       | reverse | CGAATCTAATAAATACTCACAATATATAC   |
